# Supplementary material
Source: publisher figshare collection journal article supplement (https://acs.figshare.com/ndownloader/files/4212448)
Supplement: Supplementary file 1 [file 4212448]

# Benzyl-Substituted Room Temperature Ionic Liquids for CO<sub>2</sub>/N<sub>2</sub> Separations

*Shannon M. Mahurin<sup>1\*</sup>, Thomas Dai<sup>1</sup>, Josh Yeary<sup>1</sup>, Huimin Luo<sup>2</sup>, Sheng Dai<sup>1,3\*</sup>*

<sup>1</sup>Chemical Sciences Division, Oak Ridge National Laboratory, Oak Ridge, TN 37831

<sup>2</sup>Energy and Transportation Science, Oak Ridge National Laboratory, Oak Ridge, TN 37831

<sup>3</sup>Dept. of Chemistry, University of Tennessee, Knoxville, TN 37996

## Synthesis of RTILs

The room temperature ionic liquids were synthesized according to the following procedures. The temperature at which decomposition of the liquid began, or the onset temperature, and NMR lines are also provided for all of the ionic liquids.

**1-Benzyl 3-methylimidazolium bis(trifluoromethylsulfonyl)imide [BzMIM][Tf<sub>2</sub>N] (a).** From benzyl bromide (5.08 g, 29.7 mmol), methylimidazole (2.44 g, 29.7 mmol), and LiNTf<sub>2</sub> (8.52 g, 29.7 mmol), 12.12 g (26.7 mmol) of [BzMIM][Tf<sub>2</sub>N] was obtained as a yellow liquid (yield 90%). <sup>1</sup>H-NMR data: δ, 8.72 (s, 1H), 7.36 (m, 5H), 7.23 (s, 1H), 7.22 (s, 1H), 5.28 (s, 2H), and 3.89 (s, 3H). <sup>13</sup>C-NMR: δ, 135.75 (CH), 132.40 (C), 129.58 (CH), 128.75 (CH), 123.86 (CH), 122.14 (CH), 119.73 (CF<sub>3</sub>, q, J<sub>C-F</sub> = 321.2 Hz), 53.34 (CH<sub>2</sub>), and 36.14 (CH<sub>3</sub>). T<sub>onset</sub> = 413°C

**N-Benzyl N-methylpyrrolidinium bis(trifluoromethylsulfonyl)imide [BzMPyrr][Tf<sub>2</sub>N] (b).** From benzyl bromide (3.28 g, 19.2 mmol), 1-methylpyrrolidine (1.63 g, 19.2 mmol), and LiNTf<sub>2</sub> (5.51 g, 19.2 mmol), 6.07 g (13.3 mmol) of [BzMPyrr][Tf<sub>2</sub>N] was obtained as a yellow liquid (yield 69%). <sup>1</sup>H-NMR data: δ, 7.46 (m, 5H), 4.43 (s, 2H), 3.61 (m, 2H), 3.38 (m, 2H), 2.90 (s, 3H), and 2.24 (m, 4H). <sup>13</sup>C-NMR: δ, 132.00 (CH), 130.67 (C), 129.19 (CH), 127.30 (CH), 119.61 (CF<sub>3</sub>, q, J<sub>C-F</sub> = 321.3 Hz), 66.76 (CH<sub>2</sub>), 63.10 (CH<sub>2</sub>), 47.40 (CH<sub>2</sub>), and 20.72 (CH<sub>3</sub>). T<sub>onset</sub> = 412°C

**N-Benzyl pyridinium bis(trifluoromethylsulfonyl)imide [BzPy][Tf<sub>2</sub>N] (c).** From benzyl bromide (2.31 g, 13.5 mmol), pyridine (1.07 g, 13.5 mmol), and LiNTf<sub>2</sub> (3.88 g, 13.5 mmol), 5.39 g (12.0 mmol) of [BzPy][Tf<sub>2</sub>N] was obtained as a pale yellow liquid (yield 89%). <sup>1</sup>H-NMR

data:  $\delta$ , 8.78 (m, 2H), 8.39 (s, 1H), 7.90 (m, 2H), 7.38 (m, 5H), and 5.78 (s, 2H).  $^{13}\text{C}$ -NMR:  $\delta$ , 145.95 (CH), 145.12 (CH), 144.10 (CH), 131.81 (C), 130.59 (CH), 128.65 (CH), 128.32 (CH), 119.74 (CF<sub>3</sub>, q,  $J_{\text{C-F}}$  = 321.0 Hz), and 65.29 (CH<sub>2</sub>).  $T_{\text{onset}}$  = 389°C

**N-Benzyl 2- pyridinium bis(trifluoromethylsulfonyl)imide [Bz2MPy][Tf<sub>2</sub>N] (d).** From benzyl bromide (2.48 g, 14.5 mmol), 2-picoline (1.35 g, 14.5 mmole), and LiNTf<sub>2</sub> (4.16 g, 14.5 mmol), 5.27 g (11.3 mmol) of [Bz2MPy][Tf<sub>2</sub>N] was obtained as a yellow liquid (yield 78%).  $^1\text{H}$ -NMR data:  $\delta$ , 8.64 (m, 1H), 8.33 (s, 1H), 7.84 (m, 2H), 7.39 (m, 3H), 7.17 (m, 2H), 5.68 (s, 2H), and 2.76 (s, 3H).  $^{13}\text{C}$ -NMR:  $\delta$ , 155.57 (C), 145.65 (CH), 145.14 (CH), 130.91 (C), 130.44 (CH), 127.73 (CH), 125.92 (CH), 119.60 (CF<sub>3</sub>, q,  $J_{\text{C-F}}$  = 324.0 Hz), 61.50 (CH<sub>2</sub>) and 20.35 (CH<sub>3</sub>).  $T_{\text{onset}}$  = 403°C

**N-Benzyl 3- pyridinium bis(trifluoromethylsulfonyl)imide [Bz3MPy][Tf<sub>2</sub>N] (e).** From benzyl bromide (2.82 g, 16.5 mmol), 3-picoline (1.54 g, 16.5 mmol), and LiNTf<sub>2</sub> (4.73 g, 16.5 mmol) 6.46 g (13.9 mmol) of [Bz3MPy][Tf<sub>2</sub>N] was obtained as a yellow liquid (yield 84%).  $^1\text{H}$ -NMR data:  $\delta$ , 8.63 (s, 2H), 8.22 (d, 1H), 7.85 (t, 1H), 7.43 (m, 5H), 5.64 (s, 2H) and 2.55 (s, 3H).  $^{13}\text{C}$ -NMR:  $\delta$ , 146.25 (CH), 143.46 (CH), 141.21 (CH), 140.27 (CH), 131.80 (C), 130.11 (CH), 129.61 (CH), 129.11 (CH), 127.78 (CH), 119.64 (CF<sub>3</sub>, q,  $J_{\text{C-F}}$  = 321.3 Hz), 65.29 (CH<sub>2</sub>), and 18.16 (CH<sub>3</sub>).  $T_{\text{onset}}$  = 401°C

**N-Benzyl 4- pyridinium bis(trifluoromethylsulfonyl)imide [Bz4MPy][Tf<sub>2</sub>N] (f).** From benzyl bromide (3.13 g, 18.3 mmol), 4-picoline (1.70 g, 18.3 mmol), and LiNTf<sub>2</sub> (5.25 g, 18.3 mmol) 7.41 g (13.1 mmol) of [Bz4MPy][Tf<sub>2</sub>N] was obtained as a yellow liquid (yield 87%).  $^1\text{H}$ -NMR data:  $\delta$ , 8.65 (d, 2H), 7.77 (d, 2H), 7.42 (m, 5H), 5.65 (s, 2H), and 2.61 (s, 3H).  $^{13}\text{C}$ -NMR:  $\delta$ , 160.00 (C), 143.00 (CH), 131.95 (C), 130.41 (CH), 129.58 (CH), 128.67 (CH), 119.65 (CF<sub>3</sub>, q,  $J_{\text{C-F}}$  = 321.3 Hz), 64.08 (CH<sub>2</sub>) and 21.79 (CH<sub>3</sub>).  $T_{\text{onset}}$  = 420°C

The viscosity values at different temperatures were measured and are shown in Table S1.

| RTIL                        | Viscosity (cP) |           |           |           |           |
|-----------------------------|----------------|-----------|-----------|-----------|-----------|
|                             | T = 298 K      | T = 303 K | T = 313 K | T = 323 K | T = 333 K |
| [Bz2MPy][Tf <sub>2</sub> N] | 174            | 127       | 70        | 42        | 28        |
| [Bz3MPy][Tf <sub>2</sub> N] | 160            | 104       | 58        | 36        | 25        |
| [Bz4MPy][Tf <sub>2</sub> N] | 132            | 96        | 55        | 34        | 23        |
| [BzPy]                      | 84             | 62        | 36        | 23        | 16        |
| [BzMPyrr]                   | 353            | 247       | 133       | 77        | 49        |
| [BzMIM]                     | 61             | 48        | 26        | 17        | 12        |

**Table S1.** Shows the viscosity values for the room-temperature ionic liquids at different temperatures.
